# Supplementary material for: Syndecan-1 Expression Is Increased in the Aortic Wall of Patients with Type 2 Diabetes but Is Unrelated to Elevated Fasting Plasma Glucagon-Like Peptide-1
Source: MDPI journal article supplement (doi:10.3390/biomedicines9060697), 2021-06-20
Supplement: s1 [file s1]

# Syndecan-1 Expression is Increased in the Aortic Wall of Patients with Type 2 Diabetes but is Unrelated to Elevated Fasting Plasma Glucagon-like Peptide-1

Ntika et. al

## Figures

### 3. Results

3.1 Type 2 Diabetes is associated with decreased plasma Sdc-1 and increased expression of Sdc-1 in aortic tissue.

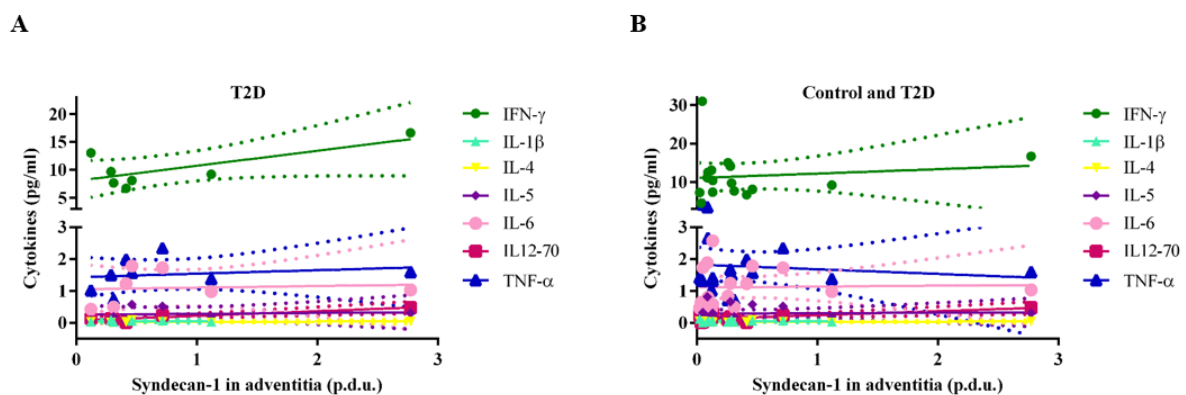

**Figure S1.** Graphical representation of Table 2. Correlations of Sdc-1 in adventitia with different cytokines in patients with (A) T2D or (B) in combination Control and T2D patients. Pearson correlation was used for the evaluation of the correlations.  $n = 10$  for Control and  $n = 9$  for T2D.

### 3.3 The Sdc-1 is increased in aortic tissue of patients with ascending AA.

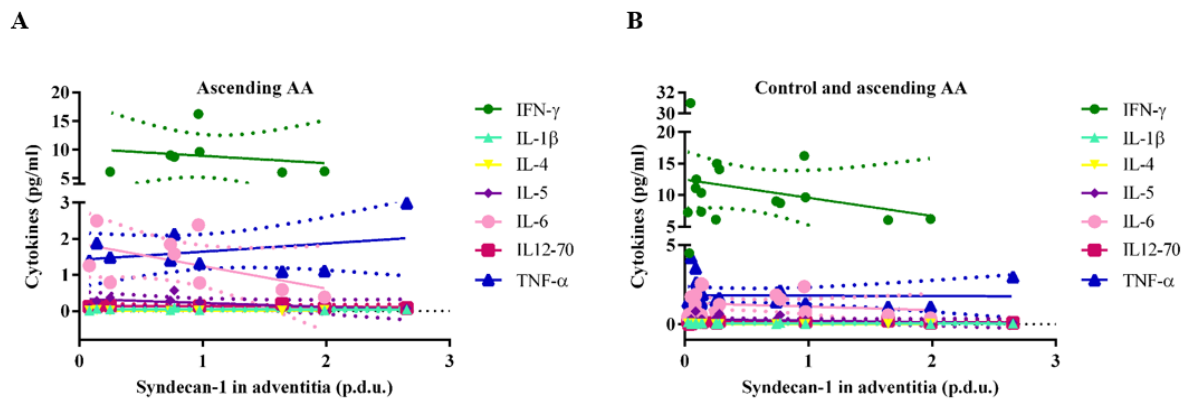

**Figure S2.** Graphical representation of Table 3. Associations of Sdc-1 in adventitia with different cytokines in patients with (A) ascending AA or (B) in combination Control and ascending AA patients. Pearson correlation was used to evaluate any associations.  $n = 10$  for Control and  $n = 10$  for ascending AA.

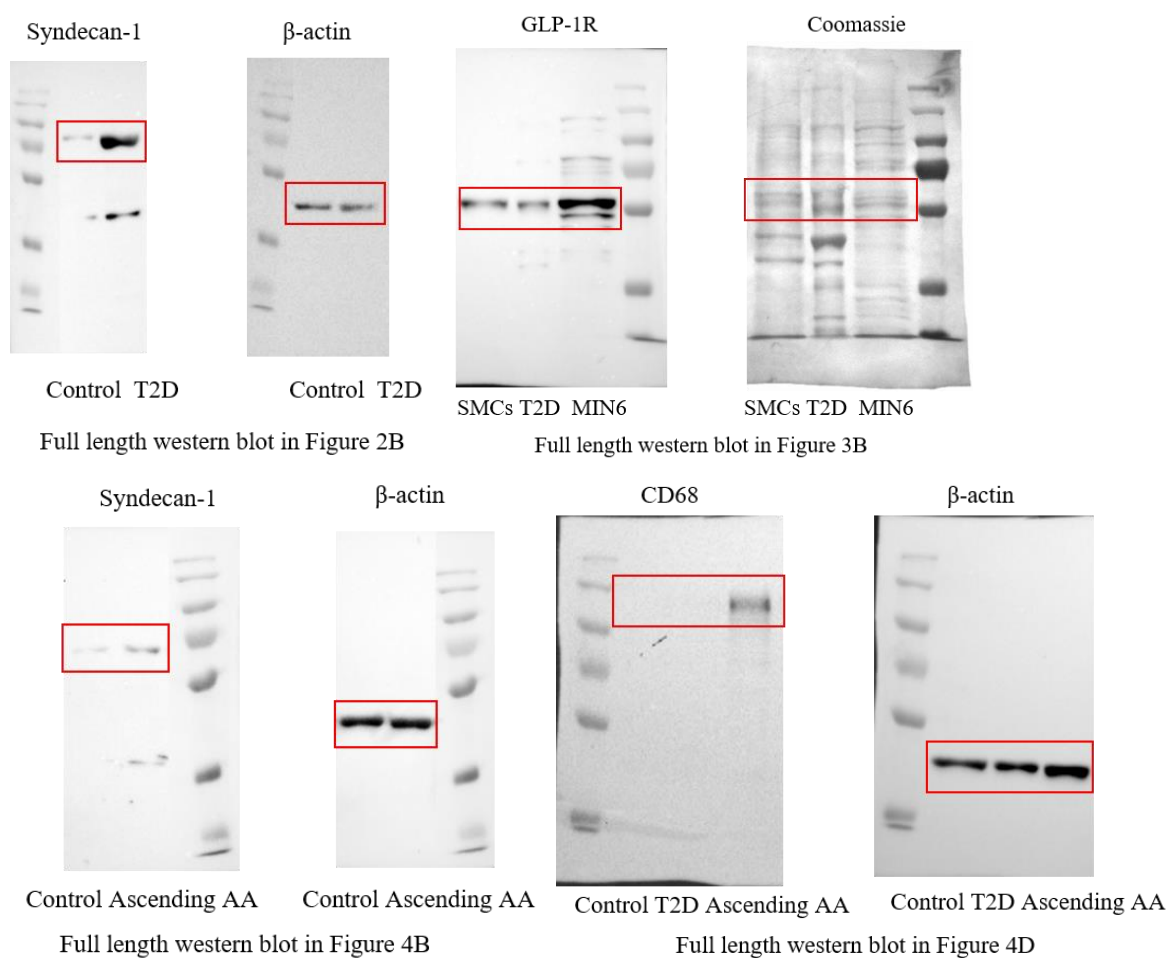

**Figure S3.** Full length western blots
